# Supplementary material for: Nanoweb anodes composed of one-dimensional, high aspect ratio, size tunable electrospun ZnFe2O4 nanofibers for lithium ion batteries
Source: Royal Society of Chemistry journal article supplement (doi:10.1039/c1jm12088c), 2011-01-01
Supplement: c1jm12088c.pdf [file c1jm12088c.pdf]

## Supporting Information

Energy dispersive X-ray analysis was conducted (EDX) by using field emission scanning electron microscope (FESEM, JEOL 7600F), equipped with a spectrometer of energy dispersion of X-ray (EDX) from Oxford instruments. The operating conditions were used as following: acceleration voltage of 20 kV and measuring time of 60 s. EDX data of both ZFO-NR and ZFO-NF are in complete agreement with the XRD data, no impurity was found.

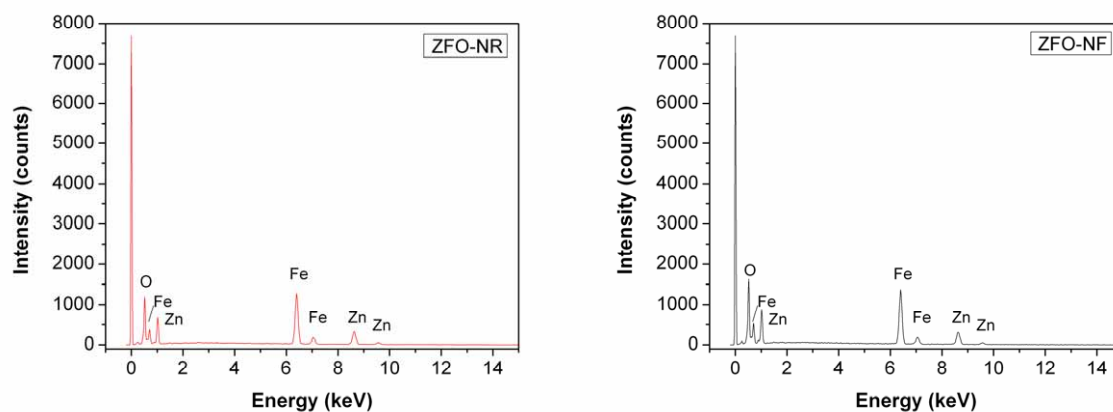

**Figure S1** EDX spectrum of  $\text{ZnFe}_2\text{O}_4$  nanorods (ZFO-NR) and nanofibers (ZFO-NF).

The electrochemical performance of  $\text{ZnFe}_2\text{O}_4$  nanowires (sample ZFO-NR) was evaluated by galvanostatic discharge/charge cycling between 0.005 – 3.0 V at the current density of  $60 \text{ mA g}^{-1}$ . The discharge/charge behavior at 1<sup>st</sup>, 2<sup>nd</sup> and 5<sup>th</sup> cycles was studied (**Figure S1**). As compared to sample ZFO-NF, the capacity retention is obviously poorer. It is due to the absence of electronic wiring in nanorods, so the electron/ion cannot effectively diffuse in the system.

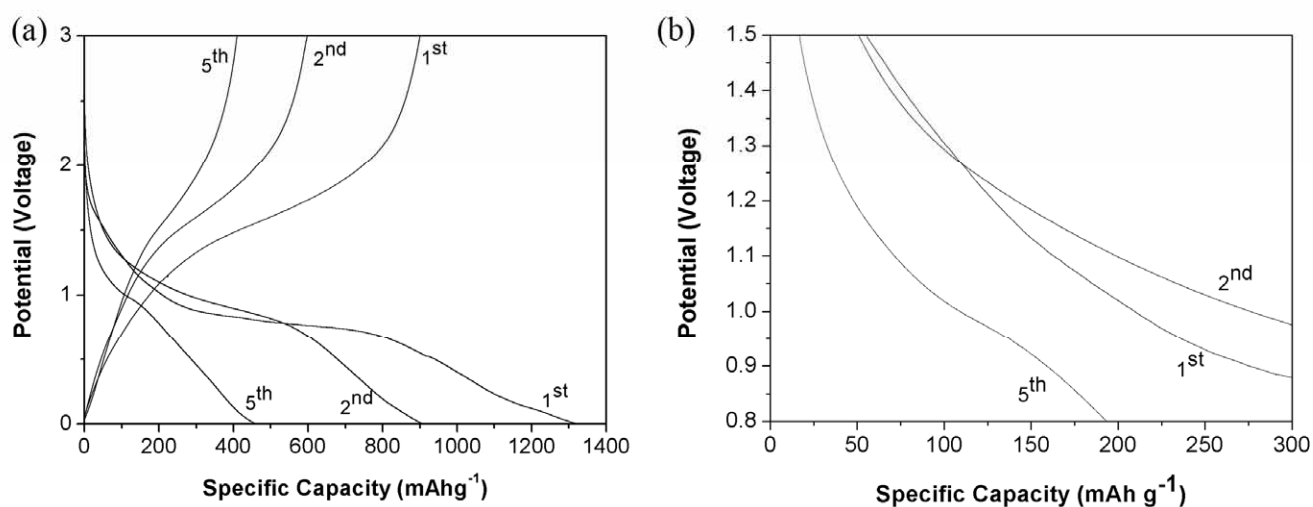

**Figure S2** (a) Discharge/charge behavior of sample ZFO-NR at 1<sup>st</sup>, 2<sup>nd</sup> and 5<sup>th</sup> cycle, in the voltage range of 0.005 – 3.0 V. (b) Magnified discharge/charge patterns between 0.8 – 1.5 V. Intercalation at 1.4 V and 0.95 V were hardly seen, indicating diffusion framework for lithium ions is better in ZFO-NF than in ZFO-NR.
